# Supplementary material
Source: Springer Nature journal article supplement (https://www.springermedizin.de/resource/supplementary/13046_2012_562_MOESM7_ESM.pdf/9662454)

# Platinum-based regimen

ERCC1

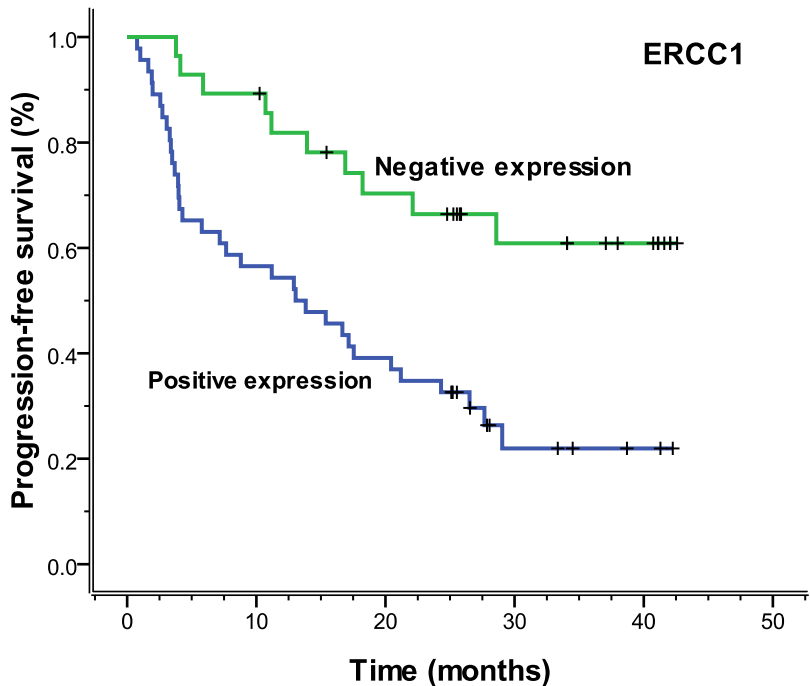

Supplement: MOESM7 [file 9662454]
